# Supplementary material for: Molecular design featuring carbazole-decorated 15H-diindolo[2,3-b:1′,2′,3′-lm]carbazole for improved efficiency and lifetime of thermally activated delayed fluorescence emitters
Source: Royal Society of Chemistry journal article supplement (doi:10.1039/c9tc05855a), 2020-01-01
Supplement: c9tc05855a1.pdf [file c9tc05855a1.pdf]

## Supporting Information

# **Molecular Design Featuring Carbazole-decorated 15H-diindolo[2,3-b:1',2',3'-lm]carbazole for Improved Efficiency and Lifetime of Thermally Activated Delayed Fluorescence Emitters**

*Rajendra Kumar Konidena, Kyung Hyung Lee, and Jun Yeob Lee\**

School of Chemical Engineering, Sungkyunkwan University, 2066 Seobu-ro, Jangan-gu,  
Suwon, Gyeonggi 440-746, Korea

Email: [leej17@skku.edu](mailto:leej17@skku.edu)

|                  |                                                                                                        |    |
|------------------|--------------------------------------------------------------------------------------------------------|----|
| <b>Figure S1</b> | DSC analysis of the compounds                                                                          | S2 |
| <b>Figure S2</b> | Cyclic voltammetry measurements of the compounds                                                       | S3 |
| <b>Table S1</b>  | Excited singlet (S <sub>1</sub> ) and triplet (T <sub>1</sub> ) energies of the adjacent layers of EML | S3 |
| <b>Table S2</b>  | Lifetime comparison table of the green TADF emitters                                                   | S3 |
| <b>Figure S3</b> | <sup>1</sup> H NMR spectra of <b>1</b> recorded in CDCl <sub>3</sub>                                   | S4 |
| <b>Figure S4</b> | <sup>1</sup> H NMR spectra of <b>CzDICz</b> recorded in CDCl <sub>3</sub>                              | S5 |
| <b>Figure S5</b> | <sup>1</sup> H NMR spectra of <b>CzDICzTrz</b> recorded in CDCl <sub>3</sub>                           | S5 |
| <b>Figure S6</b> | <sup>13</sup> C NMR spectra of <b>CzDICzTrz</b> recorded in CDCl <sub>3</sub>                          | S6 |
|                  | References                                                                                             | S6 |

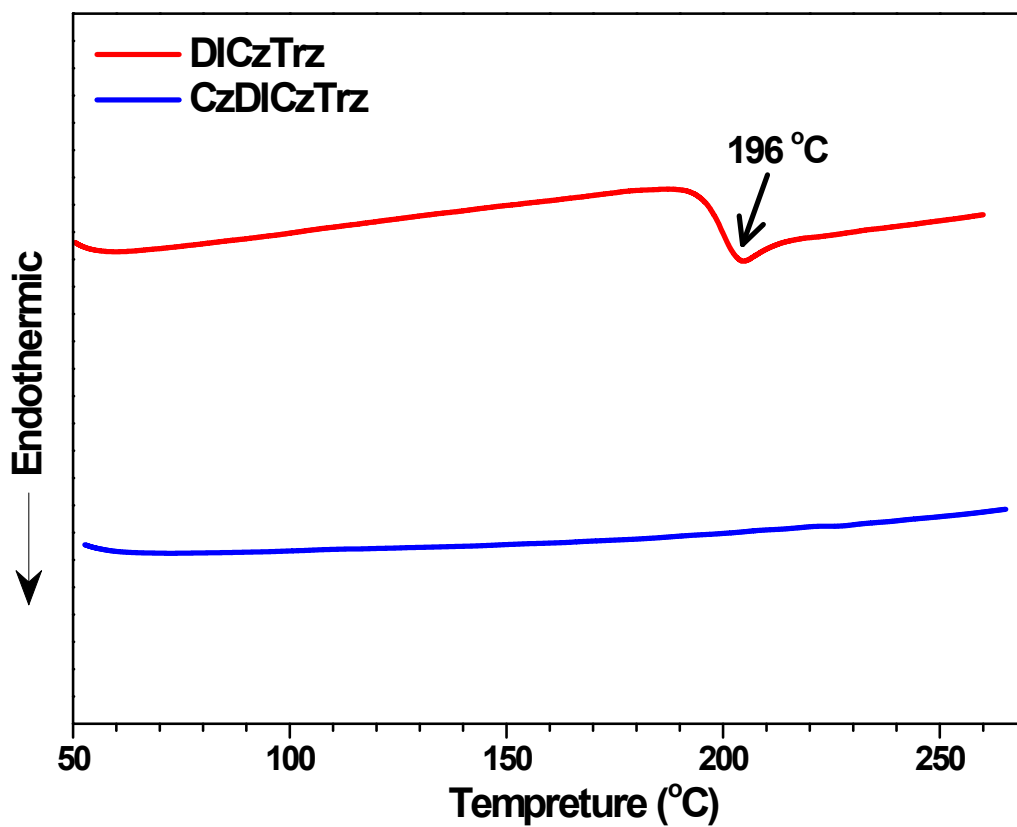

Figure S1. DSC analysis of the compounds

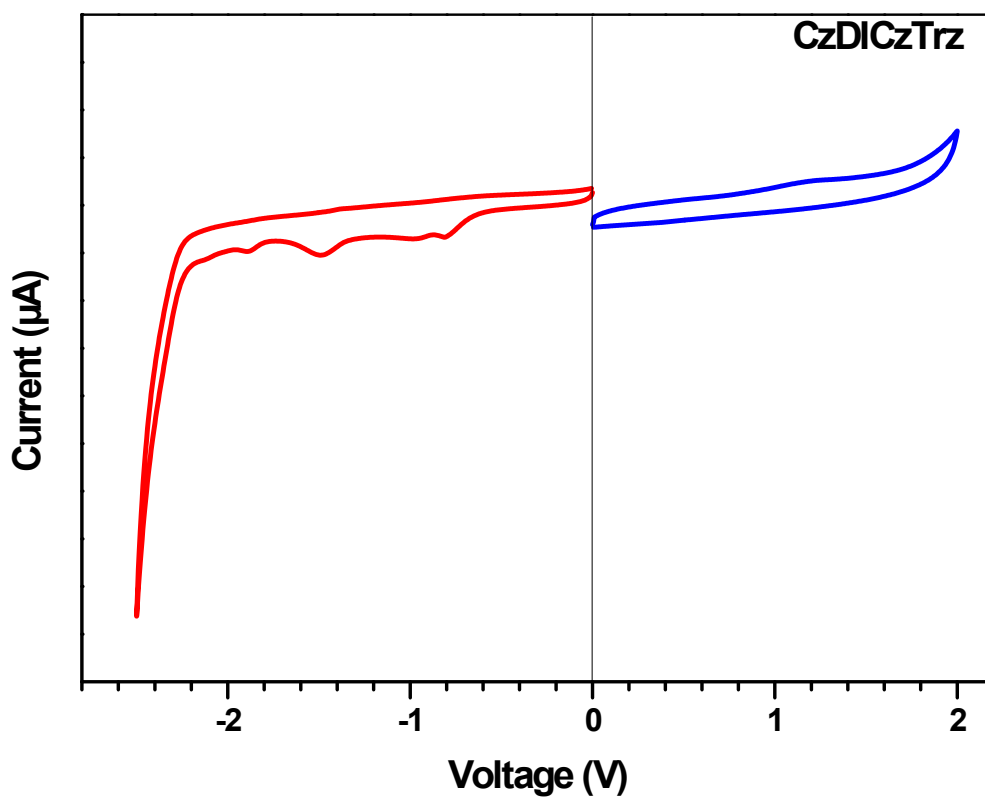

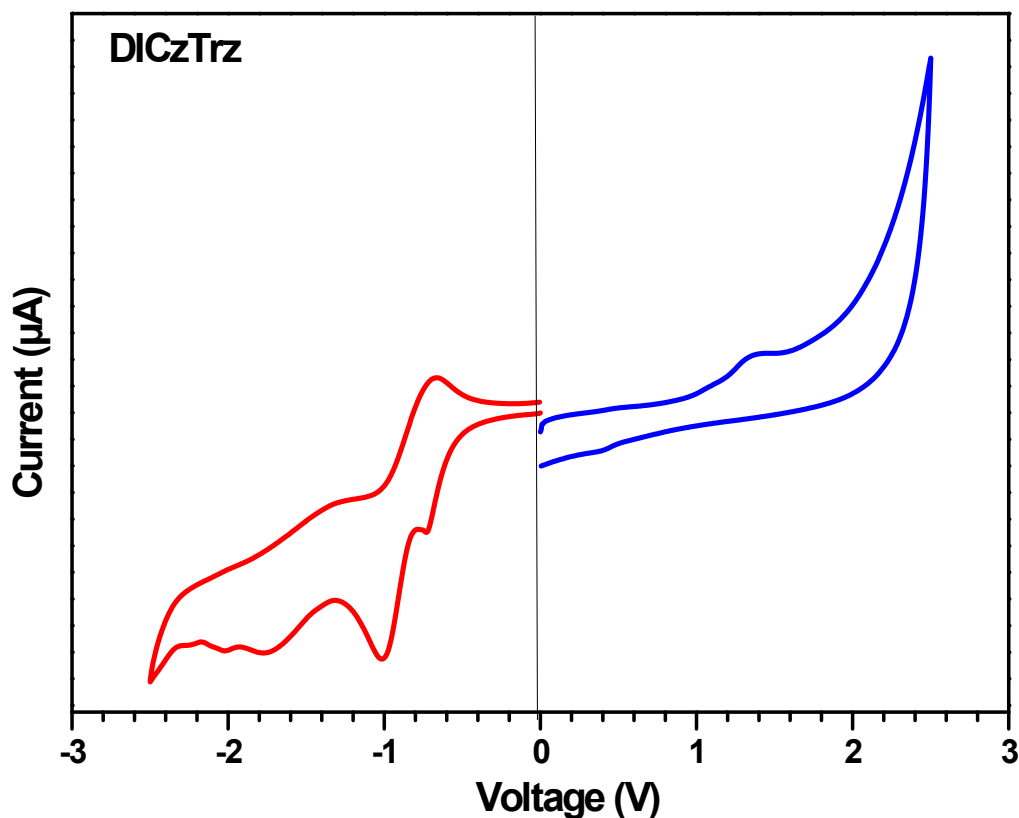

**Figure S2.** Cyclic voltammety measurements of the compounds

**Table S1.** Excited singlet (S<sub>1</sub>) and triplet (T<sub>1</sub>) energies of the adjacent layers of EML and host

| Compound | S <sub>1</sub> (eV) | T <sub>1</sub> (eV) |
|----------|---------------------|---------------------|
| PCZAC    | 3.35                | 2.99                |
| DBFTrz   | 3.44                | 2.94                |
| CzTrz    | 2.96                | 2.82                |

**Table S2.** Lifetime comparison table of the green TADF emitters

| TADF dopant | Lifetime                               | Ref              |
|-------------|----------------------------------------|------------------|
| CzDICzTrz   | LT80 ~ 440 h @ 1000 cd/m <sup>2</sup>  | <b>This work</b> |
| 4CzIPN      | LT80 ~ 250 h @ 1000 cd/m <sup>2</sup>  | 1                |
| 4CzIPN      | LT80 ~ 1100 h @ 1000 cd/m <sup>2</sup> | 2                |
| 4CzIPN      | LT70 ~ 500 h @ 2000 cd/m <sup>2</sup>  | 3                |
| 4CzIPN-Me   | LT50 ~ 1470 h @ 1000 cd/m <sup>2</sup> | 4                |
| OSTFCN      | LT50 ~ 180 h @ 500 cd/m <sup>2</sup>   | 5                |

|           |                                       |   |
|-----------|---------------------------------------|---|
| PXZ-Trz   | LT50 ~ 100 h @ 2791 cd/m <sup>2</sup> | 6 |
| TXO-PhCz  | LT50 ~ 80 h @ 1000 cd/m <sup>2</sup>  | 7 |
| TCzTrzDBF | LT85 ~ 224 h @ 3000 cd/m <sup>2</sup> | 8 |
| BCzTrzDBF | LT85 ~ 133 h @ 3000 cd/m <sup>2</sup> | 8 |

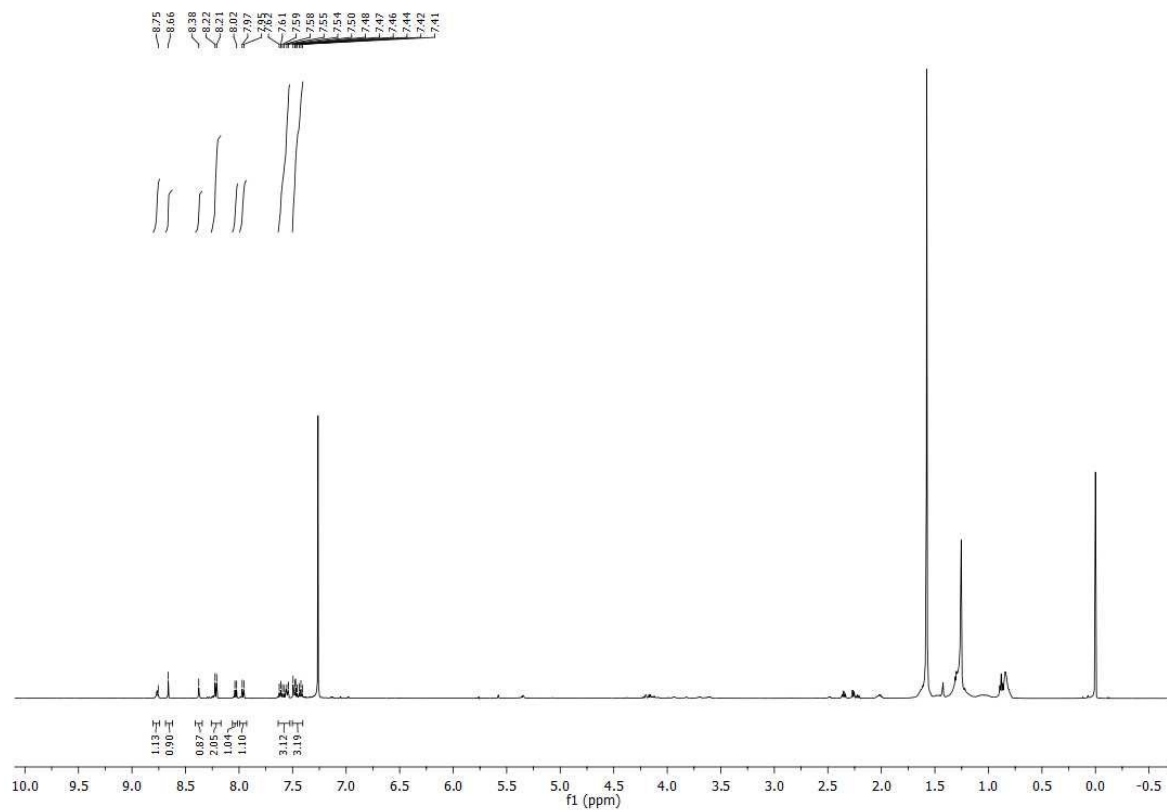

**Figure S3.** <sup>1</sup>H NMR spectra of **1** recorded in CDCl<sub>3</sub>

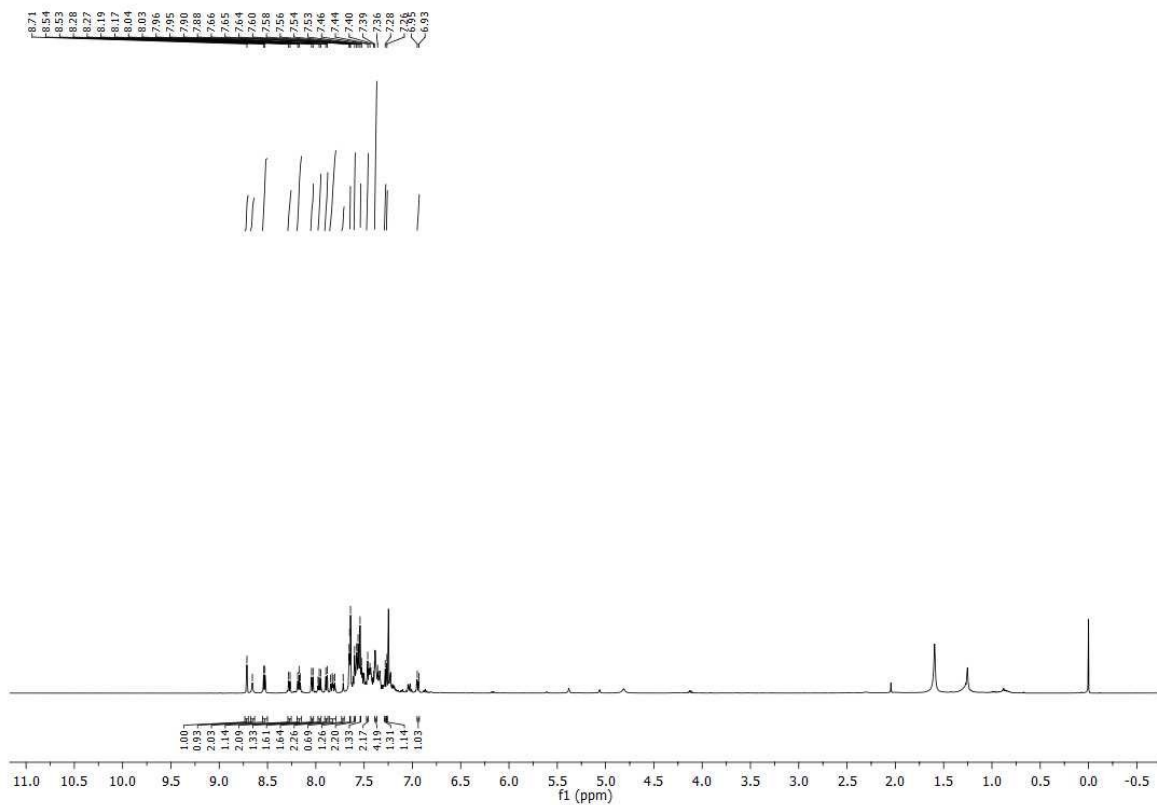

**Figure 4.**  $^1\text{H}$  NMR spectra of **CzDICzTrz** recorded in  $\text{CDCl}_3$

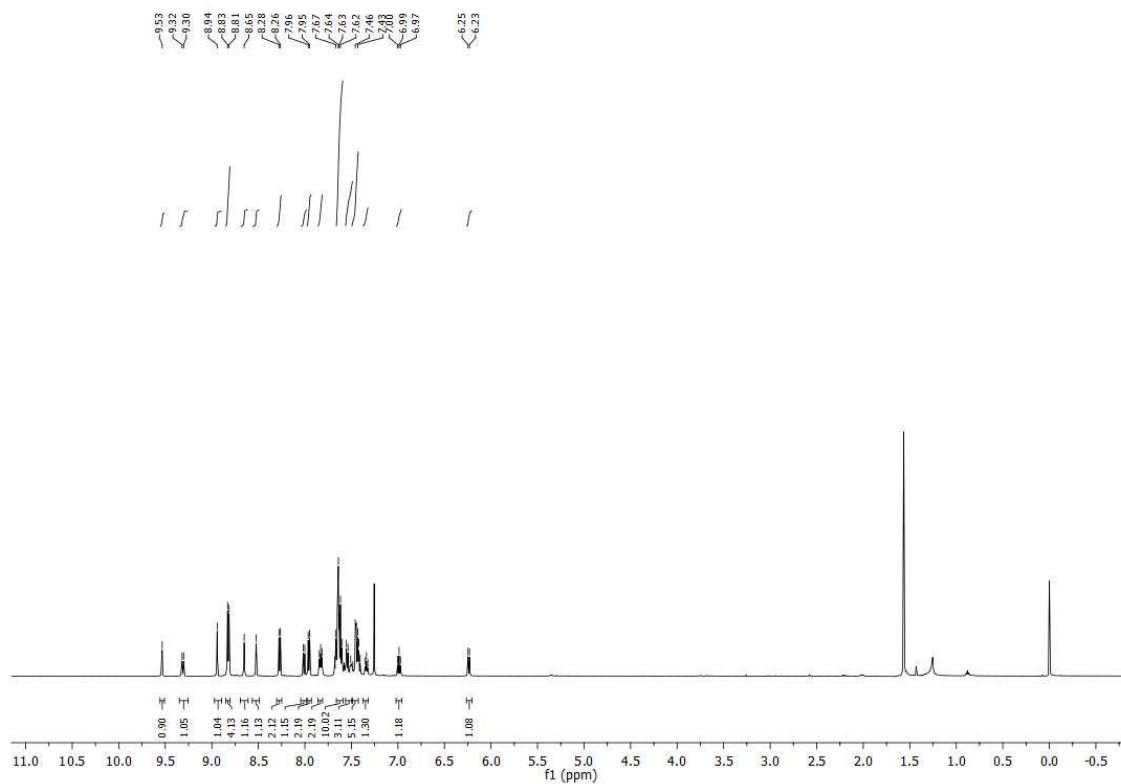

**Figure S5.**  $^1\text{H}$  NMR spectra of **CzDICzTrz** recorded in  $\text{CDCl}_3$

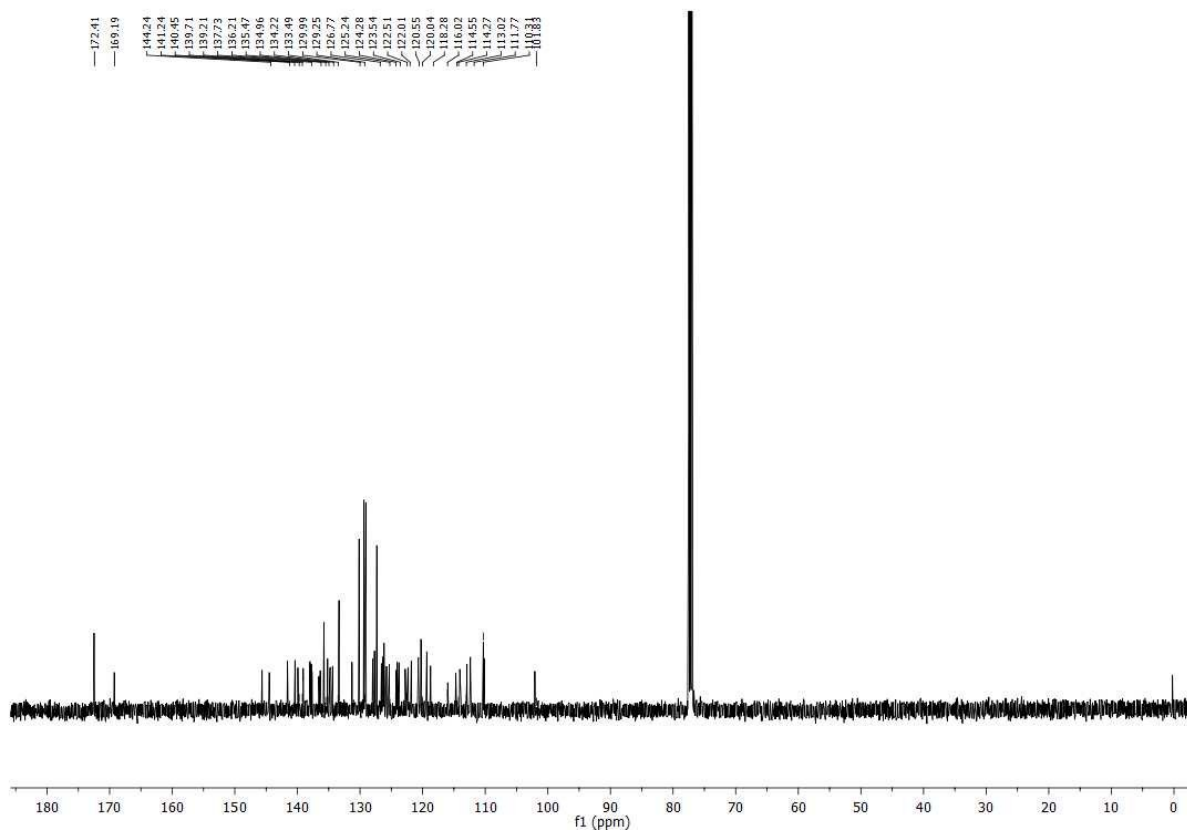

**Figure S6.**  $^{13}\text{C}$  NMR spectra of **CzDICzTrz** recorded in  $\text{CDCl}_3$

### References

1. Y. Im, W. Song and J. Y. Lee, *J. Mater. Chem. C*, **2015**, *3*, 8061.
2. W. Song, T. Kim, Y. Lee and J. Y. Lee, *J. Mater. Chem. C*, **2017**, *5*, 3948.
3. L. S. Cui, Y. M. Xie, Y. K. Wang, C. Zhong, Y. L. Deng, X. Y. Liu, Z. Q. Jiang and L. S. Liao, *Adv. Mater.* **2015**, *27*, 4213.
4. T. Furukawa, H. Nakanotani, M. Inoue and C. Adachi, *Sci. Rep.* **2015**, *5*, 8.
5. Y. K. Wang, S. F. Wu, Y. Yuan, S. H. Li, M. K. Fung, L. S. Liao and Z. Q. Jiang, *Org. Lett.* **2017**, *19*, 3155.
6. H. Nakanotani, T. Higuchi, T. Furukawa, K. Masui, K. Morimoto, M. Numata, H. Tanaka, Y. Sagara, T. Yasuda and C. Adachi, *Nat. Commun.* **2014**, *5*, 7.

7. X. P. Lv, H. Wang, L. Q. Meng, X. F. Wei, Y. Z. Chen, X. B. Kong, J. J. Liu, J. X. Tang, P. F. Wang and Y. Wang, *Chin. Phys. Lett.* **2016**, *33*, 4.
8. J. G. Yu, S. H. Han, H. L. Lee, W. P. Hong and J. Y. Lee, *J. Mater. Chem. C*, **2019**, *7*, 2919.
